# Supplementary material for: Lung Function Impairment, Associating Hyperinflation with Impaired Diffusion Capacity and Transfer Coefficient, Is a Risk Factor for Hip Osteoporosis in Patients with Chronic Obstructive Pulmonary Disease
Source: MDPI journal article supplement (doi:10.3390/jcm12062383), 2023-03-20
Supplement: s1 [file s1]

## Supplementary Materials:

**Table S1.** Description of pulmonary parameters on functional respiratory tests.

| Variable                         | N  | Mean                            | SD     | Min    | Median    | Max    |
|----------------------------------|----|---------------------------------|--------|--------|-----------|--------|
| FEV1 (mL)                        | 90 | 1530.9                          | 562.90 | 510.0  | 1430.0    | 3050.0 |
| FEV1 (%)                         | 90 | 55.311                          | 17.160 | 23.0   | 53.50     | 93.0   |
| FEV1/FVC (%)                     | 90 | 56.037                          | 11.322 | 32.1   | 55.40     | 89.7   |
| TLC (mL)                         | 80 | 6583.3                          | 1468.8 | 3570.0 | 6710.0    | 9860.0 |
| TLC (%)                          | 80 | 109.99                          | 17.637 | 68.0   | 109.50    | 153.0  |
| DLCO (mmol/Kpa/min)              | 80 | 4.256                           | 1.428  | 1.5    | 4.03      | 8.0    |
| DLCO (%)                         | 80 | 50.963                          | 15.245 | 15.0   | 50.50     | 83.0   |
| DLCO/AV (mmol/Kpa/min/L)         | 80 | 1.064                           | 0.361  | 0.3    | 1.03      | 2.0    |
| DLCO/AV (%)                      | 80 | 76.163                          | 25.705 | 21.0   | 75.00     | 132.0  |
| Variable                         | N  | Categories                      |        |        | N (%)     |        |
| GOLD Stage                       | 90 | 1 (FEV <sub>1</sub> > 80%)      |        |        | 8 (8.9)   |        |
|                                  |    | 2 (FEV <sub>1</sub> ≥50 & ≤80%) |        |        | 46 (51.1) |        |
|                                  |    | 3 (FEV <sub>1</sub> ≥30 & <50%) |        |        | 31 (34.4) |        |
|                                  |    | 4 (FEV <sub>1</sub> <30%)       |        |        | 5 (5.6)   |        |
| FEV1 (%)                         | 90 | <30                             |        |        | 5 (5.6)   |        |
|                                  |    | ≥30 & <50                       |        |        | 31 (34.4) |        |
|                                  |    | ≥50 & ≤80                       |        |        | 46 (51.1) |        |
|                                  |    | > 80                            |        |        | 8 (8.9)   |        |
| DLCO (%)                         | 80 | <70                             |        |        | 68 (43.3) |        |
|                                  |    | ≥70                             |        |        | 12 (41.1) |        |
| DLCO/AV (%)                      | 80 | <80                             |        |        | 22 (24.7) |        |
|                                  |    | ≥80                             |        |        | 53 (59.6) |        |
| TLC (%)                          | 80 | ≤ 115                           |        |        | 49 (61.3) |        |
|                                  |    | >115                            |        |        | 31 (38.8) |        |
| DLCO<70%, DLCO/AV<80% & TLC>115% | 80 | No                              |        |        | 60 (75)   |        |
|                                  |    | Yes                             |        |        | 20 (25)   |        |
